# Supplementary material for: Evolutionary and functional analysis of mulberry type III polyketide synthases
Source: PubMed Central journal article supplement (PMC4973071; doi:10.1186/s12864-016-2843-7), 2016-08-04
Supplement: 12864_2016_2843_MOESM3_ESM.pdf [file 12864_2016_2843_MOESM3_ESM.pdf]

MnSTs1 : MAPNNVPEESQ-SVIRRG-HEVASILAIGTANEDNFFNQADYDYFRVNTSEDKTELKKEKRIKESLIKKRHMRLTEDLLKENPSMCTYDAPSLNARMDLKLVEMPKLGESAAIE : 118  
MnSTs2 : MAPNNVPEESQ-SVIRRG-PGVASILAIGTANEDNFFNQADYDYFRVNTSEDKTELKKEKRIKESLIKKRHMRLTEDLLKENPSMCSYDAPSLNARMDLKLVEMPKLGESAAIA : 118  
MnSTs3 : MAPNNVPEESQ-SVIRRG-PGVASILAIGTANEDNFFNQADYDYFRVNTSEDKTELKKEKRIKESLIKKRHMRLTEDLLKENPSMCSYDAPSLNARMDLKLVEMPKLGESAAIA : 118  
MnSTs4 : MAPNNVPEESQ-SVIRRG-PGVASILAIGTANEDNFFNQADYDYFRVNTSEDKTELKKEKRIKESLIKKRHMRLTEDLLKENPSMCSYDAPSLNARMDLKLVEMPKLGESAAIA : 118  
MnSTs5 : MAPNNVPEESQ-SVIRRG-PGVASILAIGTANEDNFFNQADYDYFRVNTSEDKTELKKEKRIKESLIKKRHMRLTEDLLKENPSICTYDAPSLNARMDLKLVEMPKLGESAAIA : 118  
MnSTs6 : MAPNNVPEESQ-SVIRRG-PGVASILAIGTANEDNFFNQADYDYFRVNTSEDKTELKKEKRIKESLIKKRHMRLTEDLLKENPSICTYDAPSLNARMDLKLVEMPKLGESAAIA : 118  
MnSTs7 : MAPNNVPEESQ-SVIRRG-PGVASILAIGTANEDNFFNQADYDYFRVNTSEDKTELKKEKRIKESLIKKRHMRLTEDLLKENPSICTYDAPSLNARMDLKLVEMPKLGESAAIA : 118  
MnSTs8 : MAPNNVPEESQ-SVIRRG-PGVASILAIGTANEDNFFNQADYDYFRVNTSEDKTELKKEKRIKESLIKKRHMRLTEDLLKENPSMCSYDAPSLNARMDLKLVEMPKLGESAAIA : 118  
MnSTs9 : MAPNNVPEESQ-SVIRRG-PGVASILAIGTANEDNFFNQADYDYFRVNTSEDKTELKKEKRIKESLIKKRHMRLTEDLLKENPSMCSYDAPSLNARMDLKLVEMPKLGESAAIA : 118  
MnSTs10 : MAPNNVPEESQ-SVIRRG-PGVASILAIGTANEDNFFNQADYDYFRVNTSEDKTELKKEKRIKESLIKKRHMRLTEDLLKENPSMCTYDAPSLNARMDLKLVEMPKLGESAAIA : 118  
MnCHs1 : ---MVTVEVR-KAQRAG-P---VTIMAGTATPNCIDSSYPDYFRITNSEHKTLEKKEKRMCEKSLIKKRYMYLHEEILKENPNICAYMAPSLDARQDMVVVEVKLGKEAATK : 112  
MnCHs2 : ---MVTVEVC-RAQRAG-P---ATIMAGTANPNCFDQRTYDFYFRITNSEHKTLEKKEKRMCEKSLIKKRYMYLHEEILKENPNICAYMAPSLDARQDMVVVEVKLGKEAATK : 112  
MnCHs3 : MTP---SVHEIR-KAQRAG-P---ATVLSIGTATPNFVQADYDYFRITNSDHMTDLKKEKRMCEKSMITKRRHMYLHEEILKENPKMCEYMAPSLDARQDMVVVEVKLGKEAATK : 113  
MnCHs4 : ---MSTPSSVQIR-KAQRAG-P---AAVLAIGTANPNYFFQDYDFYFRITNSDHMTDLKKEKRMCEKSMITKRRHMYLHEEILKENPKMCEYMAPSLDARQDMVVVEVKLGKEAATK : 113  
MnCHs5 : ---MATSVQIR-KAQRAG-L---AAVLAIGTANPNFMQADYDFYFRITNSEHKTLEKKEKRMCEKSMITKRRHMYLHEEILKENPKMCEYMAPSLDARQDMVVVEVKLGKEAATK : 113  
MnCHs6 : ---MATSVEIR-KAQRAG-P---AAVLAIGTANPNFMQADYDFYFRITNSEHKTLEKKEKRMCEKSMITKRRHMYLHEEILKENPKMCEYMAPSLDARQDMVVVEVKLGKEAATK : 113  
MnPKs1 : ---MSRVESEAPRRPPTPRGRATLAIKGAFFSGLIQECLVGVIRDTNCDQ-ASIKKLELCKITTVKTRVYVMCKDLLEKYBELAREGTPINQRLIENPAVVEVMAKESLA : 115  
MnPKs2 : ---MGSLDDAR-LTSPKATPGKATILALGKAFHQVLMQSYLVDCFRDNTCDQ-PELKKLTLCKITTVKTRVYVMCKDLLEKYBELAREGTRVQKRLDIDNDAVQMAIEASQA : 114

MnSTs1 : AIKEWQPKSKITHIIVNSTSGVMPGADYQLIRSLGLKTSVKRVMVLYHQCFFAGGTVLRIAKDLAENNPGRVLLVCSSEIIPTRFRGSEDDSSASLVSDAIFADGASAVIVGAN-VEDE : 237  
MnSTs2 : AIKEWQPKSKITHIIVNSTSGVMPGADYQLIRSLGLKTSVKRVMVLYHQCFFAGGTVLRIAKDLAENNPGRVLLVCSSEIIPTRFRGSEDDSSASLVSDAIFADGASAVIVGAN-VEDE : 237  
MnSTs3 : AIKEWQPKSKITHIIVNSTSGVMPGADYQLIRSLGLKTSVKRVMVLYHQCFFAGGTVLRIAKDLAENNPGRVLLVCSSEIIPTRFRGSEDDSSASLVSDAIFADGASAVIVGAN-VEDE : 237  
MnSTs4 : AIKEWQPKSKITHIIVNSTSGVMPGADYQLIRSLGLKTSVKRVMVLYHQCFFAGGTVLRIAKDLAENNPGRVLLVCSSEIIPTRFRGSEDDSSASLVSDAIFADGASAVIVGAN-VEDE : 237  
MnSTs5 : AIKEWQPKSKITHIIVNSTSGVMPGADYQLIRSLGLKTSVKRVMVLYHQCFFAGGTVLRIAKDLAENNPGRVLLVCSSEIIPTRFRGSEDDSSASLVSDAIFADGASAVIVGAN-VEDE : 237  
MnSTs6 : AIKEWQPKSKITHIIVNSTSGVMPGADYQLIRSLGLKTSVKRVMVLYHQCFFAGGTVLRIAKDLAENNPGRVLLVCSSEIIPTRFRGSEDDSSASLVSDAIFADGASAVIVGAN-VEDE : 237  
MnSTs7 : AIKEWQPKSKITHIIVNSTSGVMPGADYQLIRSLGLKTSVKRVMVLYHQCFFAGGTVLRIAKDLAENNPGRVLLVCSSEIIPTRFRGSEDDSSASLVSDAIFADGASAVIVGAN-VEDE : 237  
MnSTs8 : AIKEWQPKSKITHIIVNSTSGVMPGADYQLIRSLGLKTSVKRVMVLYHQCFFAGGTVLRIAKDLAENNPGRVLLVCSSEIIPTRFRGSEDDSSASLVSDAIFADGASAVIVGAN-VEDE : 237  
MnSTs9 : AIKEWQPKSKITHIIVNSTSGVMPGADYQLIRSLGLKTSVKRVMVLYHQCFFAGGTVLRIAKDLAENNPGRVLLVCSSEIIPTRFRGSEDDSSASLVSDAIFADGASAVIVGAN-VEDE : 237  
MnSTs10 : AIKEWQPKSKITHIIVNSTSGVMPGADYQLIRSLGLKTSVKRVMVLYHQCFFAGGTVLRIAKDLAENNPGRVLLVCSSEIIPTRFRGSEDDSSASLVSDAIFADGASAVIVGAN-VEDE : 237  
MnCHs1 : AIKEWQPKSKITHIIVNSTSGVMPGADYQLIRSLGLKTSVKRVMVLYHQCFFAGGTVLRIAKDLAENNPGRVLLVCSSEIIPTRFRGSEDDSSASLVSDAIFADGASAVIVGAN-VEDE : 237  
MnCHs2 : AIKEWQPKSKITHIIVNSTSGVMPGADYQLIRSLGLKTSVKRVMVLYHQCFFAGGTVLRIAKDLAENNPGRVLLVCSSEIIPTRFRGSEDDSSASLVSDAIFADGASAVIVGAN-VEDE : 237  
MnCHs3 : AIKEWQPKSKITHIIVNSTSGVMPGADYQLIRSLGLKTSVKRVMVLYHQCFFAGGTVLRIAKDLAENNPGRVLLVCSSEIIPTRFRGSEDDSSASLVSDAIFADGASAVIVGAN-VEDE : 237  
MnCHs4 : AIKEWQPKSKITHIIVNSTSGVMPGADYQLIRSLGLKTSVKRVMVLYHQCFFAGGTVLRIAKDLAENNPGRVLLVCSSEIIPTRFRGSEDDSSASLVSDAIFADGASAVIVGAN-VEDE : 237  
MnCHs5 : AIKEWQPKSKITHIIVNSTSGVMPGADYQLIRSLGLKTSVKRVMVLYHQCFFAGGTVLRIAKDLAENNPGRVLLVCSSEIIPTRFRGSEDDSSASLVSDAIFADGASAVIVGAN-VEDE : 237  
MnCHs6 : AIKEWQPKSKITHIIVNSTSGVMPGADYQLIRSLGLKTSVKRVMVLYHQCFFAGGTVLRIAKDLAENNPGRVLLVCSSEIIPTRFRGSEDDSSASLVSDAIFADGASAVIVGAN-VEDE : 237  
MnPKs1 : CIKEWGRPPDITHTIVVSSSEIRLPGDGLHLSAQGLRTRDVGKRVMLYFVQYGGVGLRVAKDIAENNPGRVLLVCSSEIIPTRFRGSEDDSSASLVSDAIFADGASAVIVGAN-VEDE : 233  
MnPKs2 : CIKNWGRVSDITHTIVVSSSEIRLPGDGLHLSAQGLRTRDVGKRVMLYFVQYGGVGLRVAKDIAENNPGRVLLVCSSEIIPTRFRGSEDDSSASLVSDAIFADGASAVIVGAN-VEDE : 232

MnSTs1 : GSVERFLRIVSTSEVILNSENIVGSHLRDCLGTLIVLRFQPKIIGKNIQTCLLEAALGPPGIS-DW-NSVFWAFPGGAAIIEKEIEBKAGLEKKEKLDKTDWNVVSEYGMSSATVFFILN : 355  
MnSTs2 : GSVERFLRIVSTSEVILNSENIVGSHLRDCLGTLIVLRFQPKIIGKNIQTCLLEAALGPPGIS-DW-NSVFWAFPGGAAIIEKEIEBKAGLEKKEKLDKTDWNVVSEYGMSSATVFFILN : 355  
MnSTs3 : GSVERFLRIVSTSEVILNSENIVGSHLRDCLGTLIVLRFQPKIIGKNIQTCLLEAALGPPGIS-DW-NSVFWAFPGGAAIIEKEIEBKAGLEKKEKLDKTDWNVVSEYGMSSATVFFILN : 355  
MnSTs4 : GSVERFLRIVSTSEVILNSENIVGSHLRDCLGTLIVLRFQPKIIGKNIQTCLLEAALGPPGIS-DW-NSVFWAFPGGAAIIEKEIEBKAGLEKKEKLDKTDWNVVSEYGMSSATVFFILN : 355  
MnSTs5 : GSVERFLRIVSTSEVILNSENIVGSHLRDCLGTLIVLRFQPKIIGKNIQTCLLEAALGPPGIS-DW-NSVFWAFPGGAAIIEKEIEBKAGLEKKEKLDKTDWNVVSEYGMSSATVFFILN : 355  
MnSTs6 : GSVERFLRIVSTSEVILNSENIVGSHLRDCLGTLIVLRFQPKIIGKNIQTCLLEAALGPPGIS-DW-NSVFWAFPGGAAIIEKEIEBKAGLEKKEKLDKTDWNVVSEYGMSSATVFFILN : 355  
MnSTs7 : GSVERFLRIVSTSEVILNSENIVGSHLRDCLGTLIVLRFQPKIIGKNIQTCLLEAALGPPGIS-DW-NSVFWAFPGGAAIIEKEIEBKAGLEKKEKLDKTDWNVVSEYGMSSATVFFILN : 355  
MnSTs8 : GSVERFLRIVSTSEVILNSENIVGSHLRDCLGTLIVLRFQPKIIGKNIQTCLLEAALGPPGIS-DW-NSVFWAFPGGAAIIEKEIEBKAGLEKKEKLDKTDWNVVSEYGMSSATVFFILN : 355  
MnSTs9 : GSVERFLRIVSTSEVILNSENIVGSHLRDCLGTLIVLRFQPKIIGKNIQTCLLEAALGPPGIS-DW-NSVFWAFPGGAAIIEKEIEBKAGLEKKEKLDKTDWNVVSEYGMSSATVFFILN : 355  
MnSTs10 : GSVERFLRIVSTSEVILNSENIVGSHLRDCLGTLIVLRFQPKIIGKNIQTCLLEAALGPPGIS-DW-NSVFWAFPGGAAIIEKEIEBKAGLEKKEKLDKTDWNVVSEYGMSSATVFFILN : 355  
MnCHs1 : ---VEKHFIFQLVSAQAQTLIPDSEGAIIGHLREYGLTFFHLKDVQVPLLESKNIEKSLVEAFTPIGIS-DW-NSIFWIAHFGGPAIILDQVBAKCGKLEKLRATRHVLSYEGMSSACVFFILN : 347  
MnCHs2 : ---VEKHFIFQLVSAQAQTLIPDSEGAIIGHLREYGLTFFHLKDVQVPLLESKNIEKSLVEAFTPIGIS-DW-NSIFWIAHFGGPAIILDQVBAKCGKLEKLRATRHVLSYEGMSSACVFFILN : 347  
MnCHs3 : ---SVERHFIFQLVSAQAQTLIPDSEGAIIGHLREYGLTFFHLKDVQVPLLESKNIEKSLVEAFTPIGIS-DW-NSIFWIAHFGGPAIILDQVBAKCGKLEKLRATRHVLSYEGMSSACVFFILN : 348  
MnCHs4 : ---SIBERHFIFQLVSAQAQTLIPDSEGAIIGHLREYGLTFFHLKDVQVPLLESKNIEKSLVEAFTPIGIS-DW-NSIFWIAHFGGPAIILDQVBAKCGKLEKLRATRHVLSYEGMSSACVFFILN : 350  
MnCHs5 : ---AIBERHFIFQLVSAQAQTLIPDSEGAIIGHLREYGLTFFHLKDVQVPLLESKNIEKSLVEAFTPIGIS-DW-NSIFWIAHFGGPAIILDQVBAKCGKLEKLRATRHVLSYEGMSSACVFFILN : 348  
MnCHs6 : ---SIBERHFIFQLVSAQAQTLIPDSEGAIIGHLREYGLTFFHLKDVQVPLLESKNIEKSLVEAFTPIGIS-DW-NSIFWIAHFGGPAIILDQVBAKCGKLEKLRATRHVLSYEGMSSACVFFILN : 348  
MnPKs1 : -DLESFPMELNSAVQQLFNTHDVIIGLSEEGINFRDLPCLEEDNIEEFCKLMKAGLKFY-NELFWAVHFGGPAIILNKLESCLLRSEKLVSRRALMDYEGMSSANTLVYVIE : 351  
MnPKs2 : -ETEKLEFELHSAQRLEGGDRTIIGLRETEGIGSFKLRELCVIEDSEVGECKMLMGVGFDKWEYMKMFAVHFGGPAIILNRIEKRLDLOPEKLNASRKALMDYEGMSSANTLVYVIE : 351

MnSTs1 : QMRKRSLEAKKSTTGDGLEWVLLGFGPGLTIVETVVLQSVPIA : 399  
MnSTs2 : QMRKRSLEAKKSTTGDGLEWVLLGFGPGLTIVETVVLQSVPIA : 399  
MnSTs3 : QMRKRSLEAKKSTTGDGLEWVLLGFGPGLTIVETVVLQSVPIA : 399  
MnSTs4 : QMRKRSLEAKKSTTGDGLEWVLLGFGPGLTIVETVVLQSVPIA : 399  
MnSTs5 : QMRKRSLEAKKSTTGDGLEWVLLGFGPGLTIVETVVLQSVPIA : 399  
MnSTs6 : QMRKRSLEAKKSTTGDGLEWVLLGFGPGLTIVETVVLQSVPIA : 399  
MnSTs7 : QMRKRSLEAKKSTTGDGLEWVLLGFGPGLTIVETVVLQSVPIA : 399  
MnSTs8 : QMRKRSLEAKKSTTGDGLEWVLLGFGPGLTIVETVVLQSVPIA : 399  
MnSTs9 : QMRKRSLEAKKSTTGDGLEWVLLGFGPGLTIVETVVLQSVPIA : 399  
MnSTs10 : QMRKRSLEAKKSTTGDGLEWVLLGFGPGLTIVETVVLQSVPIA : 399  
MnCHs1 : EMRRKGAEGLKTTGEGLEWVLFQFGPGLTIVETVVLHLSVAI-- : 389  
MnCHs2 : EMRRKGAEGLKTTGEGLEWVLFQFGPGLTIVETVVLHLSVAI-- : 389  
MnCHs3 : EMRRKSVLEEGKATGEGLEWVLFQFGPGLTIVETVVLHLSPAV- : 391  
MnCHs4 : EMRRKSAEGLKTTGEGLEWVLFQFGPGLTIVETVVLHLSPIIN- : 394  
MnCHs5 : EMRRKSAEGLKTTGEGLEWVLFQFGPGLTIVETVVLHLSPIIN- : 391  
MnCHs6 : EMRRKSAEGLKTTGEGLEWVLFQFGPGLTIVETVVLHLSPIIN- : 391  
MnPKs1 : NMRELKREGSE-----EWGFLAFGPGITTEFGLIRSL---- : 385  
MnPKs2 : YMLLES--SKMVKDQENEMLILAFGPGITTEFGLIRLNTTV : 393
