# Supplementary material for: Evolutionary and functional analysis of mulberry type III polyketide synthases
Source: PubMed Central journal article supplement (PMC4973071; doi:10.1186/s12864-016-2843-7), 2016-08-04

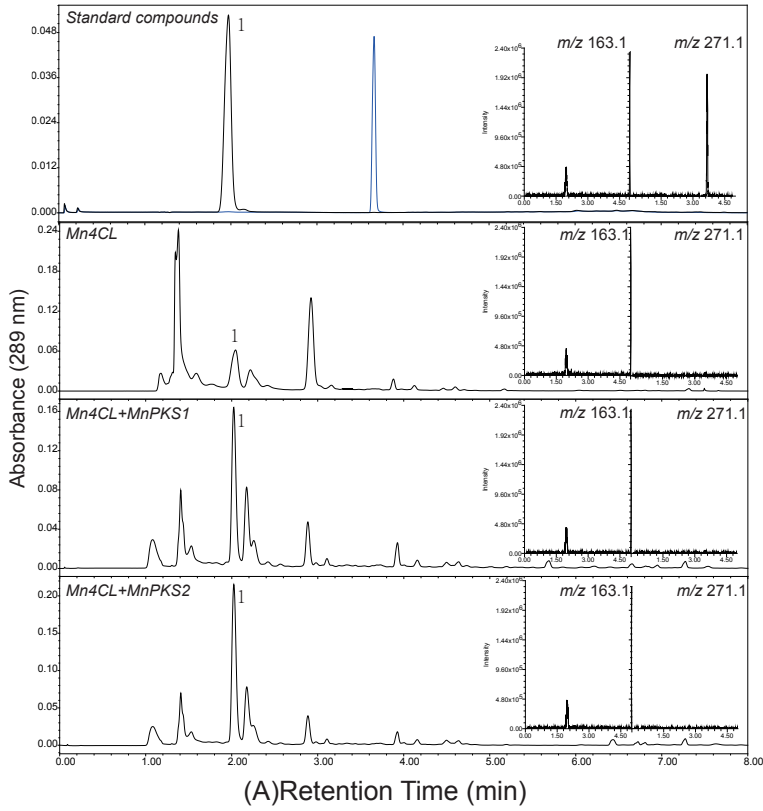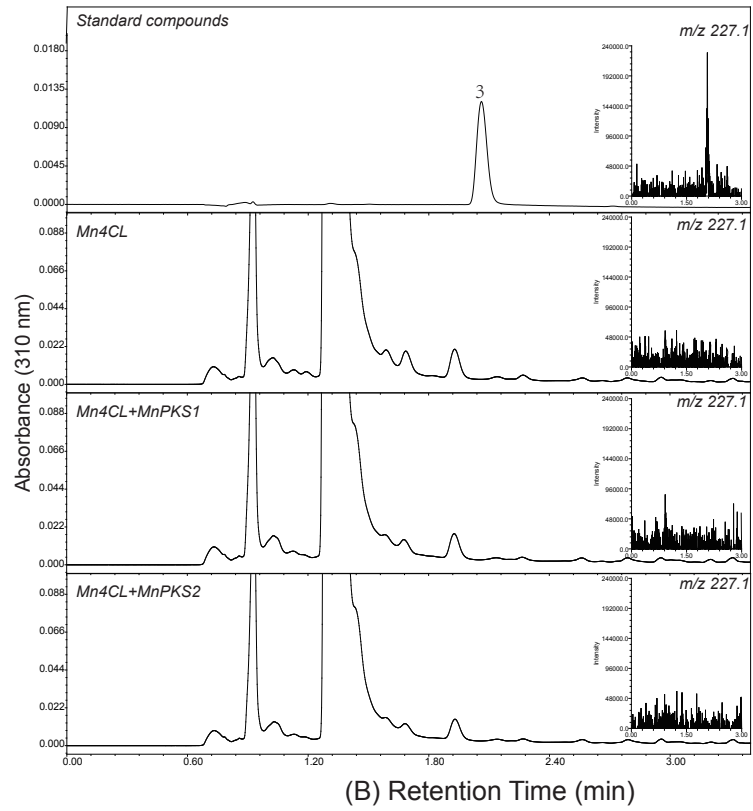

Supplement: 12864_2016_2843_MOESM6_ESM.pdf [file 12864_2016_2843_MOESM6_ESM.pdf]
